# Supplementary material
Source: PubMed Central journal article supplement (PMC4013278)

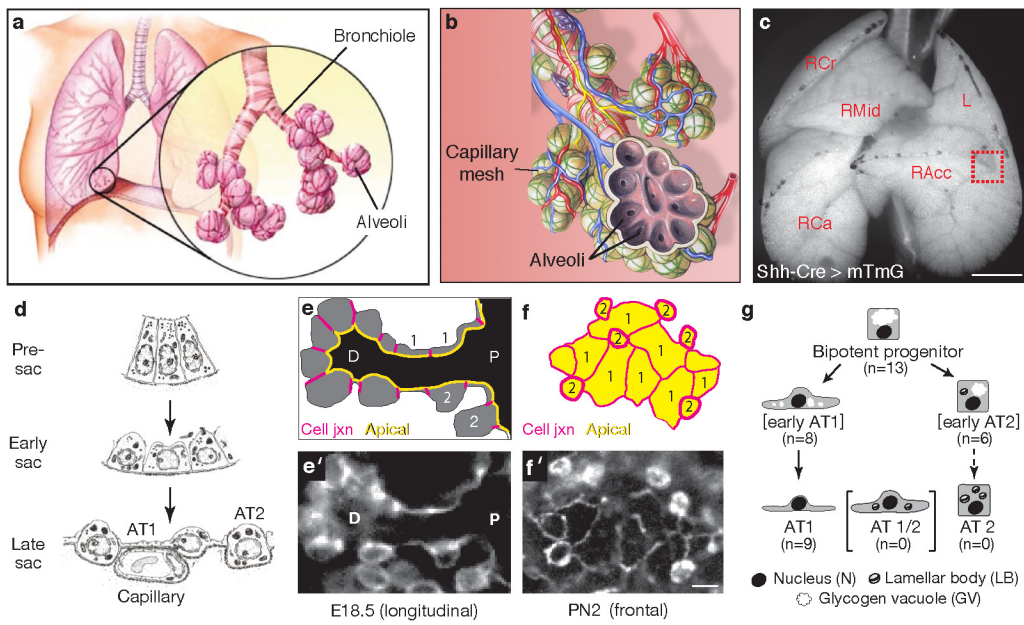

Shh-Cre-ER > mTmG (Tamox at E15)

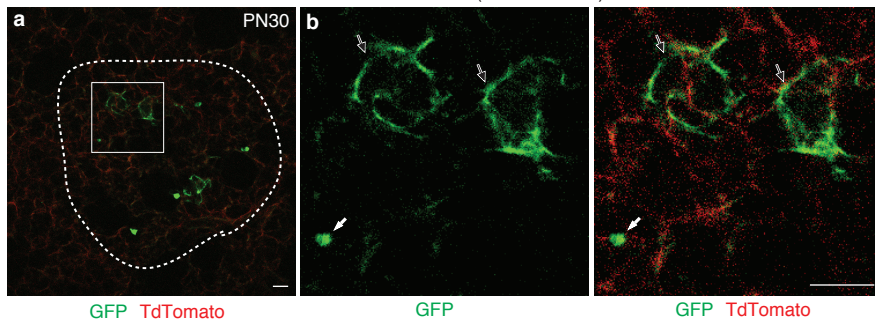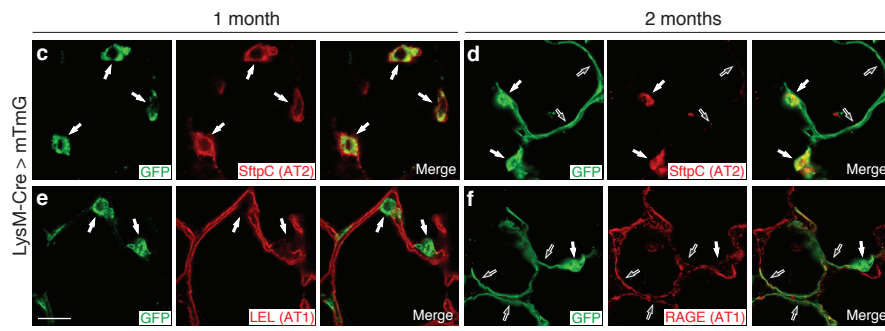

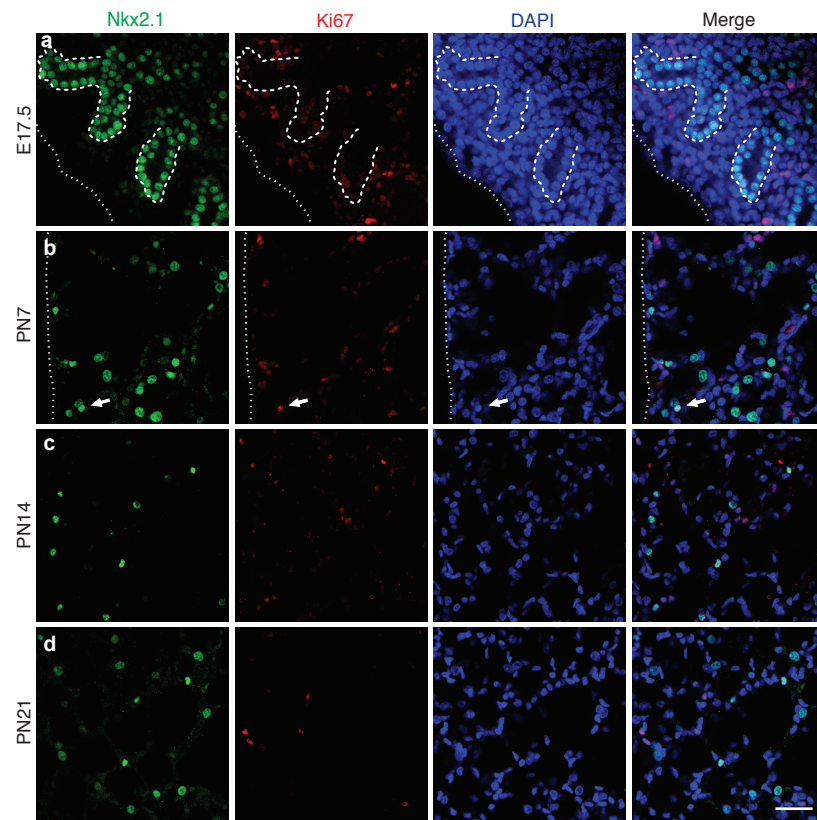

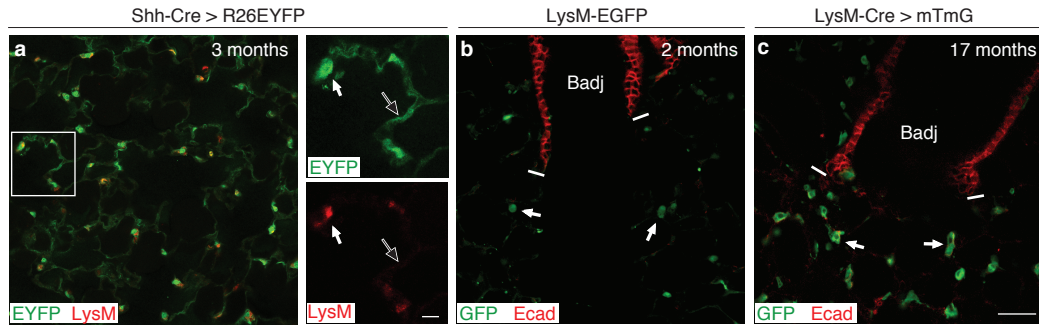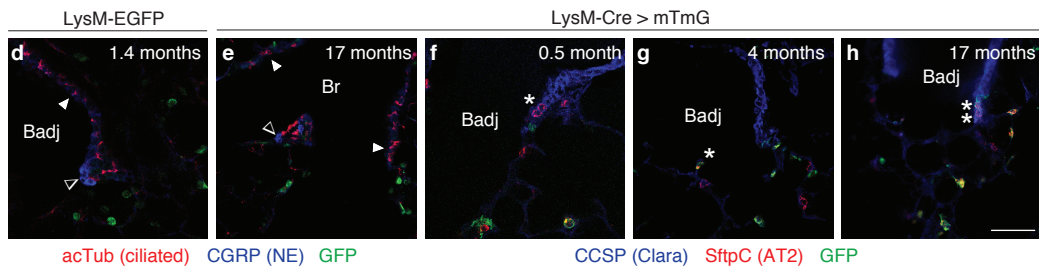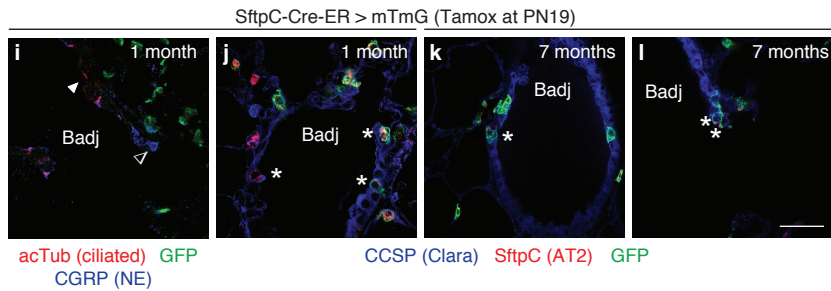

**m**

| Genotype, Age                              | Cell type (cell marker) |             |               |                |                              | No. of Badj analyzed |
|--------------------------------------------|-------------------------|-------------|---------------|----------------|------------------------------|----------------------|
|                                            | Ciliated (acTub)        | NE (CGRP)   | AT2 (SftpC)   | Clara (CCSP)   | Double positive (CCSP/SftpC) |                      |
| LysM-EGFP, 9d                              | 0/850                   | 0/29        |               | 0/400          | 0/4                          | 8                    |
| LysM-EGFP, 1.4 mo                          | 0/350                   | 0/35        |               | 0/500          | 1/7 (14%)                    | 14                   |
| LysM-EGFP, 9.5 mo                          | 0/550                   | 0/86        |               | 0/400          | 0/3                          | 9                    |
| LysM-Cre>mTmG, 0.5 mo                      | 0/650                   | 1/42 (2.3%) | 150/650 (23%) | 0/700          | 0/7                          | 19                   |
| LysM-Cre>mTmG, 4.2 mo                      | 0/500                   | 0/24        | 363/455 (80%) | 0/500          | *5/10 (50%)                  | 11                   |
| LysM-Cre>mTmG, 17 mo                       | 0/450                   | 0/31        | 156/236 (66%) | *40/900 (4.4%) | *17/43 (40%)                 | 13                   |
| SftpC-CreER>mTmG, 1 mo (1 mg Tamox + 13d)  | 0/550                   | 0/51        | 554/588 (94%) | 0/500          | *4/7 (57%)                   | 11                   |
| SftpC-CreER>mTmG, 7 mo (1 mg Tamox + 192d) | 0/900                   | 1/47 (2.1%) | 499/514 (97%) | *8/900 (0.9%)  | *9/11 (82%)                  | 22                   |

\* >90% of the marked cells were solitary and almost all others were doublets. The largest observed cell clusters were 3 (CCSP<sup>+</sup>/SftpC<sup>+</sup>) and 5 (CCSP<sup>+</sup>) cells.



SftpC-Cre-ER > mTmG (Tamox at PN18)

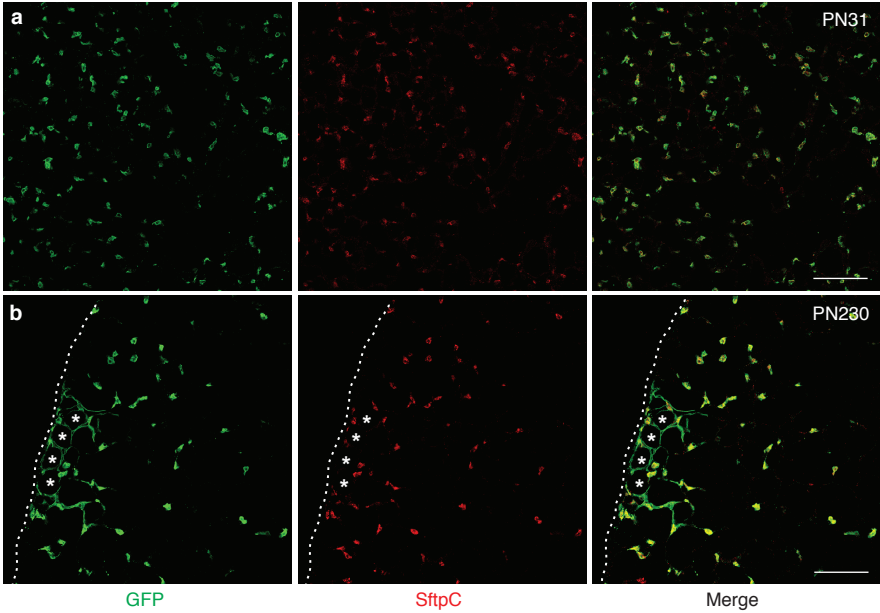

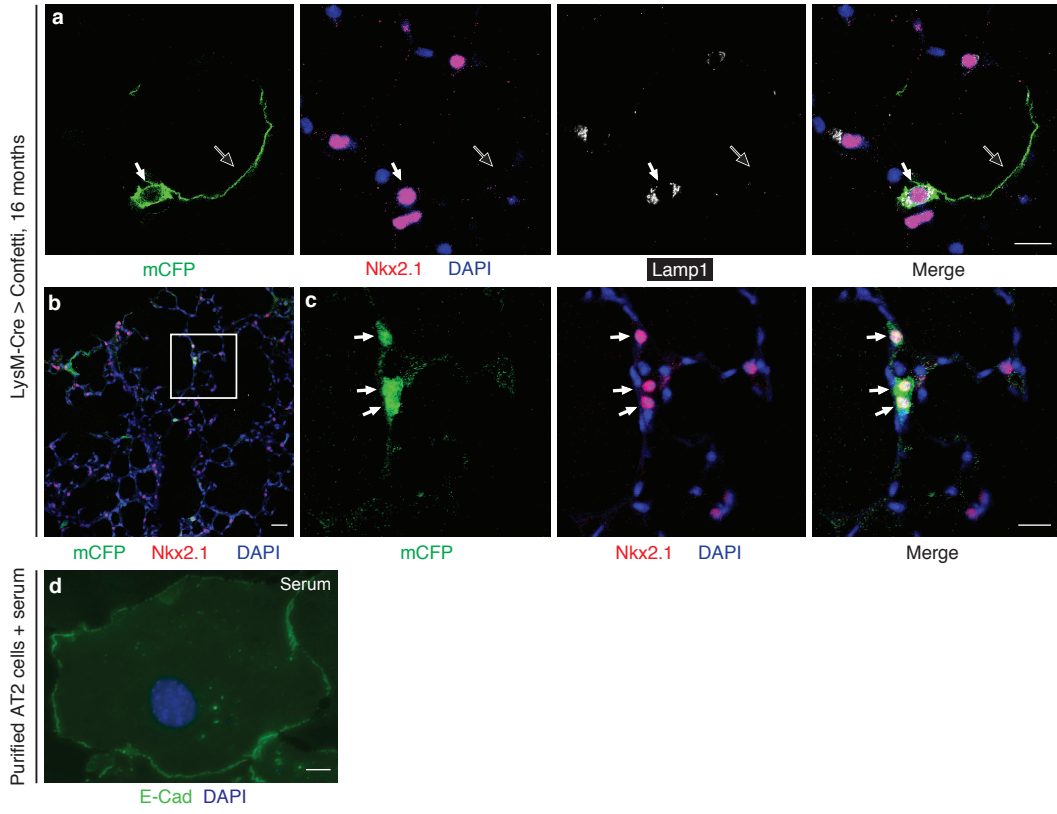

Supplement: NIHMS570673-supplement-01.pdf [file NIHMS570673-supplement-01.pdf]
