# Supplementary material
Source: PubMed Central journal article supplement (PMC4013278)
Supplement: NIHMS570673-supplement-02.pdf [file NIHMS570673-supplement-02.pdf]

## **Supplementary Information Guide**

(1) Contains: Supplementary tables 1-3

(2) Description: 1 PDF file

**Supplementary Table 1.** Validated, robust alveolar epithelial cell markers.

**Supplementary Table 2.** Percentiles of receptor genes expressed by bipotent progenitors and LysM-lineage alveolar type 2 (AT2) cells; and expression levels of EGF receptor family members with histograms of probe-specific levels.

**Supplementary Table 3.** Genes highly selectively expressed by bipotent progenitors and LysM-lineage alveolar type 2 (AT2) cells at the 90<sup>th</sup> percentile or higher; and annotation enrichment analysis for these gene profiles.

**Supplementary Table 1.** Validated, robust alveolar epithelial cell markers

| AT1 Markers                 |                        |
|-----------------------------|------------------------|
| Antigen or Lectin (synonym) | Reference              |
| Ager (Rage)                 | Fehrenbach et al. 1998 |
| Aqp5                        | Nielsen et al. 1997    |
| LEL                         | Bankston et al. 1991   |
| Pdpn (T1a)                  | Rishi et al. 1995      |
| RCA I                       | Dobbs et al. 1985      |
| AT2 Markers                 |                        |
| Antigen (synonym)           | Reference              |
| Abca3                       | Mulugeta et al. 2002   |
| Ctsh                        | Ishii et al. 1991      |
| Lamp-1, Lamp-2              | Salaun et al. 2004     |
| Lyz2 (LysM)                 | Singh et al. 1988      |
| Muc1                        | Jarrard et al. 1998    |
| Nkx2.1 (Ttf-1)*             | Ikeda et al. 1995      |
| SftpB                       | Kalina et al. 1992     |
| SftpC                       | Beers et al. 1992      |
| SftpD                       | Crouch et al. 1991     |

\* Low level expression observed in AT1 cells

- Bankston, P. W., Porter, G. A., Milici, A. J. & Palade, G. E. Differential and specific labeling of epithelial and vascular endothelial cells of the rat lung by *Lycopersicon esculentum* and *Griffonia simplicifolia* I lectins. *Eur J Cell Biol* **54**, 187-195 (1991).
- Beers, M. F. et al. An antibody with specificity for surfactant protein C precursors: identification of pro-SP-C in rat lung. *Am J Respir Cell Mol Biol* **7**, 368-378 (1992).
- Crouch, E. et al. Developmental expression of pulmonary surfactant protein D (SP-D). *Am J Respir Cell Mol Biol* **5**, 13-18 (1991).
- Dobbs, L. G., Williams, M. C. & Brandt, A. E. Changes in biochemical characteristics and pattern of lectin binding of alveolar type II cells with time in culture. *Biochim Biophys Acta* **846**, 155-166 (1985).
- Fehrenbach, H. et al. Receptor for advanced glycation endproducts (RAGE) exhibits highly differential cellular and subcellular localisation in rat and human lung. *Cell Mol Biol (Noisy-le-grand)* **44**, 1147-1157 (1998).
- Ikeda, K. et al. Gene structure and expression of human thyroid transcription factor-1 in respiratory epithelial cells. *J Biol Chem* **270**, 8108-8114 (1995).
- Ishii, Y., Hashizume, Y., Kominami, E. & Uchiyama, Y. Changes in immunoreactivity for cathepsin H in rat type II alveolar epithelial cells and its proteolytic activity in bronchoalveolar lavage fluid over 24 hours. *Anat Rec* **230**, 519-523 (1991).
- Jarrard, J. A. et al. MUC1 is a novel marker for the type II pneumocyte lineage during lung carcinogenesis. *Cancer Res* **58**, 5582-5589 (1998).
- Kalina, M., Mason, R. J. & Shannon, J. M. Surfactant protein C is expressed in alveolar type II cells but not in Clara cells of rat lung. *Am J Respir Cell Mol Biol* **6**, 594-600 (1992).
- Mulugeta, S. et al. Identification of LBM180, a lamellar body limiting membrane protein of alveolar type II cells, as the ABC transporter protein ABCA3. *J Biol Chem* **277**, 22147-22155 (2002).
- Nielsen, S., King, L. S., Christensen, B. M. & Agre, P. Aquaporins in complex tissues. II. Subcellular distribution in respiratory and glandular tissues of rat. *Am J Physiol* **273**, C1549-1561 (1997).
- Rishi, A. K. et al. Cloning, characterization, and development expression of a rat lung alveolar type I cell gene in embryonic endodermal and neural derivatives. *Dev Biol* **167**, 294-306 (1995).
- Salaun, B. et al. CD208/dendritic cell-lysosomal associated membrane protein is a marker of normal and transformed type II pneumocytes. *Am J Pathol* **164**, 861-871 (2004).
- Singh, G., Katyal, S. L., Brown, W. E., Collins, D. L. & Mason, R. J. Pulmonary lysozyme--a secretory protein of type II pneumocytes in the rat. *Am Rev Respir Dis* **138**, 1261-1267 (1988).

a

Receptor expression in bipotent progenitors (BP) and AT2 cells relative to cells in GEXC

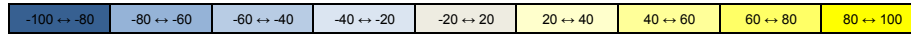

| Gene            | BP  |     |     | AT2 |     |     | Gene    | BP  |     |     | AT2 |     |     | Gene   | BP  |     |     | AT2 |     |     |         |     |     |     |     |     |     |
|-----------------|-----|-----|-----|-----|-----|-----|---------|-----|-----|-----|-----|-----|-----|--------|-----|-----|-----|-----|-----|-----|---------|-----|-----|-----|-----|-----|-----|
|                 | 1   | 2   | 3   | 1   | 2   | 3   |         | 1   | 2   | 3   | 1   | 2   | 3   |        | 1   | 2   | 3   | 1   | 2   | 3   |         |     |     |     |     |     |     |
| <b>Cytokine</b> |     |     |     |     |     |     |         |     |     |     |     |     |     |        |     |     |     |     |     |     |         |     |     |     |     |     |     |
| Epor            | -70 | -68 | -65 | -53 | -81 | -76 | Ednrb   | 82  | 88  | 83  | -82 | -42 | -61 | Gpr26  | -16 | -23 | -43 | 13  | 50  | -41 | Prokr2  | -61 | -81 | -92 | -66 | -85 | -58 |
| Ghr             | 36  | 39  | 30  | 3   | -31 | -39 | Npy1r   | -71 | -43 | -64 | -54 | -75 | -55 | Gpr27  | -76 | -71 | -58 | -77 | -35 | -38 | Ptadr   | -39 | -38 | -25 | -3  | -10 | -15 |
| Mpl             | -55 | -63 | -41 | -59 | -47 | -34 | Npy2r   | -2  | -1  | -19 | -62 | -6  | -22 | Gpr3   | -31 | -23 | -71 | -16 | 24  | -2  | Ptger1  | -13 | -43 | -35 | -13 | 62  | -19 |
| Pdfr            | -55 | -57 | 42  | -17 | 0   | -19 | Npy5r   | -60 | -54 | -78 | -30 | -52 | -73 | Gpr30  | -1  | -1  | -40 | -30 | -34 | -52 | Ptger2  | -40 | -13 | -3  | -32 | 86  | 8   |
| Csf3r           | 15  | 41  | 67  | 0   | 89  | 89  | Npy6r   | -48 | -65 | -66 | -82 | -25 | -23 | Gpr33  | -65 | -83 | -41 | 92  | -4  | -84 | Ptger3  | 61  | 59  | 64  | 12  | 27  | 47  |
| Il12rb1         | -89 | -87 | -75 | -40 | -16 | -6  | Ghr     | -79 | -57 | -98 | -55 | -14 | -78 | Gpr34  | 24  | 4   | -4  | -17 | -57 | -5  | Ptger4  | 43  | 41  | 31  | -13 | -8  | -9  |
| Il12rb2         | -94 | -54 | -73 | -46 | -70 | -51 | Tshr    | -39 | -44 | -55 | -71 | -23 | -56 | Gpr35  | 76  | 71  | 91  | 82  | 85  | 96  | Ptger5  | 33  | 35  | 53  | 93  | 73  | 68  |
| Il27ra          | -47 | -58 | -65 | -47 | 2   | 19  | Rxfp1   | -57 | -90 | -96 | -83 | -99 | -31 | Gpr37  | -89 | -77 | -88 | -42 | -37 | -86 | Ptger6  | -55 | -82 | -65 | -78 | -19 | -67 |
| Il6st           | 48  | 48  | 23  | 48  | 3   | 12  | Rxfp2   | -24 | -45 | -10 | -57 | -9  | -11 | Gpr371 | -62 | -75 | -66 | -70 | -75 | -57 | Ptger7  | -37 | -53 | -30 | 11  | 86  | 80  |
| Lepr            | 23  | 18  | -20 | 29  | -21 | -12 | Adora1  | -5  | 18  | -26 | -31 | -62 | -31 | Gpr39  | -95 | -89 | -73 | -26 | -63 | -83 | Qrpr    | -55 | -82 | -90 | -67 | -64 | -99 |
| Lifr            | 46  | 47  | 42  | 28  | 5   | 25  | Adora2a | -75 | -75 | -73 | -59 | 17  | -38 | Gpr4   | -10 | 0   | -75 | 20  | -48 | -33 | Rho     | -26 | -66 | -46 | -22 | -36 | -56 |
| Cntrf           | -56 | -51 | -78 | 75  | -43 | -61 | Adora2b | 87  | 86  | 97  | 88  | 77  | 90  | Gpr44  | -58 | -80 | -79 | -25 | -20 | -58 | Rh      | -40 | -73 | -31 | -56 | -44 | -44 |
| Crf1            | 55  | 60  | 60  | 10  | -16 | -51 | Adora3  | -3  | -5  | -2  | -11 | -2  | -18 | Gpr45  | -28 | -74 | -44 | -70 | -8  | -29 | S1pr1   | 25  | 32  | 32  | 82  | -1  | 16  |
| Ebi3            | 33  | 26  | 64  | 55  | 27  | 54  | Adora1a | -19 | -58 | -54 | -37 | 39  | -46 | Gpr50  | 12  | -16 | -38 | -76 | 0   | -15 | S1pr2   | 92  | 89  | 68  | -21 | 96  | 67  |
| Il12b           | -42 | -28 | -8  | 87  | -1  | 13  | Adra1b  | 99  | 83  | 83  | -47 | -34 | -66 | Gpr6   | -90 | -96 | -83 | -51 | -21 | -20 | S1pr3   | 68  | 67  | 32  | -73 | 6   | -35 |
| Il6ra           | 89  | 99  | 92  | 95  | 100 | 99  | Adra2a  | -7  | 1   | -16 | -1  | -19 | -27 | Gpr61  | -38 | -71 | -74 | -75 | -87 | -51 | S1pr4   | -9  | -9  | 7   | -7  | 86  | 77  |
| Crf2            | 43  | 33  | 76  | 91  | 100 | 95  | Adra2b  | -74 | -72 | -33 | -32 | 42  | -17 | Gpr62  | -63 | -81 | -62 | -58 | -5  | -46 | Sstr1   | -95 | -76 | -76 | -77 | -41 | -33 |
| Csf2rb          | 85  | 83  | 98  | 94  | 82  | 87  | Adra2c  | -24 | -78 | -20 | -45 | 4   | 2   | Gpr63  | -25 | -50 | -9  | 5   | 36  | -6  | Sstr2   | -47 | -63 | -61 | -24 | -55 | -29 |
| Csf2rb2         | 64  | 60  | 80  | 81  | 55  | 66  | Adrb1   | 37  | 55  | 28  | 76  | 15  | -1  | Gpr65  | 52  | 47  | 74  | 86  | 88  | 86  | Sstr3   | -96 | -82 | -73 | -27 | -53 | -25 |
| Il21r           | -36 | -39 | -10 | -6  | 47  | 50  | Adrb2   | 65  | 65  | 54  | 33  | 29  | 23  | Gpr68  | -81 | -88 | -72 | 36  | -2  | 7   | Sstr4   | 0   | -4  | -33 | -56 | -17 | 4   |
| Il2rb           | -49 | -77 | -73 | -68 | -22 | -21 | Adrb3   | -71 | -47 | -60 | -74 | -80 | -66 | Gpr75  | -85 | -98 | -69 | -44 | -34 | -70 | Sstr5   | -17 | 5   | -68 | -22 | -15 | -10 |
| Il4ra           | 42  | 43  | 68  | 55  | 54  | 80  | Agtr1a  | -14 | -14 | -49 | -6  | -70 | -35 | Gpr81  | -66 | -68 | -70 | -75 | -84 | -90 | Sucnr1  | -88 | -69 | -25 | -34 | -48 | -93 |
| Il7r            | -3  | -4  | 16  | 50  | 64  | 52  | Agtr1b  | 74  | 77  | 11  | -71 | -12 | -74 | Gpr83  | -79 | -73 | -57 | -95 | -12 | -40 | Tacr1   | -39 | -73 | -31 | -70 | -27 | -38 |
| Il9r            | -15 | -23 | -72 | -61 | -66 | -46 | Agtr2   | 20  | 9   | 0   | -61 | -14 | -66 | Gpr84  | 6   | 0   | 53  | -7  | -3  | 0   | Tacr2   | -43 | -20 | -59 | -28 | -33 | -71 |
| Csf2ra          | 67  | 67  | 85  | 87  | 70  | 87  | Aplnr   | 74  | 88  | -10 | -47 | 11  | -23 | Gpr85  | -3  | -62 | -19 | -13 | -67 | -56 | Tacr3   | -80 | -48 | -77 | -91 | -43 | -65 |
| Il13ra1         | 88  | 87  | 90  | 93  | 100 | 96  | Avpr1a  | -71 | -56 | -78 | -92 | -22 | -40 | Gpr87  | -77 | -80 | -74 | -87 | -69 | -76 | Tbxar2  | 67  | 70  | -13 | -22 | 14  | 21  |
| Il2rg           | 28  | 31  | 31  | 56  | 85  | 61  | Avpr1b  | -60 | -76 | -84 | -42 | -47 | -54 | Gpr88  | -4  | -7  | -24 | -48 | -24 | -31 | Trhr    | -67 | -60 | -74 | -97 | -24 | -55 |
| Il3ra           | -25 | -30 | -31 | -53 | 52  | 5   | Avpr2   | -72 | -79 | -70 | -41 | -23 | -73 | Grpr   | -45 | -40 | -31 | -88 | -3  | -27 | Uts2r   | -50 | -69 | -29 | -8  | -24 | -68 |
| Il5ra           | -74 | -45 | -79 | -56 | -19 | -52 | Bdkrb1  | -76 | -79 | -91 | -67 | -25 | -53 | Hcrt1  | -18 | -44 | -43 | -17 | -67 | -27 | Cxcr3   | -34 | -22 | -26 | 50  | 23  | 31  |
| Crf3            | 25  | 26  | 66  | 57  | 71  | 74  | Bdkrb2  | -7  | -17 | -54 | -86 | -30 | -70 | Hcrt2  | 74  | 34  | 17  | -31 | 62  | 34  | Cxcr4   | 26  | 12  | 50  | 21  | 87  | 72  |
| Il10ra          | 56  | 55  | 92  | 92  | 77  | 97  | Brs3    | -32 | -61 | -63 | -59 | 46  | 20  | Hmh1   | -90 | -88 | -93 | -74 | -97 | -68 | Cxcr5   | -63 | -63 | -29 | -23 | 53  | 15  |
| Il10rb          | 25  | 18  | 64  | 61  | 50  | 79  | Cobp2   | -3  | -2  | -54 | -71 | -47 | -56 | Hmh2   | -41 | -74 | -49 | 22  | 67  | 70  | Cxcr6   | -64 | -60 | -84 | -18 | -34 | -1  |
| Il20ra          | -58 | -75 | -66 | -64 | -67 | -69 | Cckar   | 14  | 18  | -2  | 93  | -7  | -12 | Hmh3   | -70 | -58 | -68 | -52 | -25 | -60 | Cxcr7   | 74  | 72  | 36  | 26  | 9   | -9  |
| Il22ra2         | -22 | -69 | -27 | -11 | -8  | -8  | Cckbr   | -67 | -71 | -84 | -90 | -47 | -49 | Hmh4   | -23 | -42 | 39  | -26 | 37  | -27 | Cxcr2   | 41  | 57  | 98  | -4  | 99  | 99  |
| Il28ra          | -76 | -64 | -73 | -50 | -4  | 51  | Ccr10   | -30 | -23 | -32 | 98  | 86  | 99  | Htr1a  | -70 | -64 | -44 | -23 | -6  | -14 | Fam188a | -19 | -27 | 67  | -11 | 29  | 27  |
| Ifnar1          | -27 | -24 | -43 | -3  | 0   | 27  | Ccr9    | -15 | -18 | -7  | 7   | 71  | 57  | Htr1b  | -40 | -32 | -59 | -46 | 23  | -49 | Fpr2    | 77  | 76  | 84  | 51  | 66  | 74  |
| Ifnar2          | 76  | 72  | 85  | 35  | 99  | 91  | Chrm1   | -85 | -69 | -61 | -58 | -51 | -52 | Htr1d  | -91 | -80 | -49 | -30 | -12 | -63 | Fpr-rs3 | -43 | -40 | -59 | -46 | 71  | -32 |
| Chrm3           | -80 | -69 | -56 | -88 | -57 | -4  | Chrm3   | -80 | -69 | -56 | -88 | -57 | -4  | Htr1f  | -78 | -94 | -78 | -46 | -9  | -53 | Fpr-rs4 | 8   | -33 | -32 | -61 | 48  | -22 |
| Chrm4           | -57 | -71 | -72 | -29 | -52 | -32 | Chrm4   | -57 | -71 | -72 | -29 | -52 | -32 | Htr2b  | -63 | -62 | -69 | -82 | -59 | -51 | Gcap14  | 31  | 36  | 36  | 85  | 36  | 53  |
| Cnr1            | -35 | -67 | -88 | -77 | -71 | -64 | Cnr1    | -35 | -67 | -88 | -77 | -71 | -64 | Htr2c  | -23 | -31 | -42 | -3  | -4  | -12 | Gmp266  | -15 | -19 | -28 | -78 | -39 | -95 |
| Cnr2            | 43  | 43  | 52  | 15  | 71  | 88  | Cnr2    | 43  | 43  | 52  | 15  | 71  | 88  | Htr4   | -70 | -78 | -41 | -51 | -74 | -69 | Gpr151  | -85 | -62 | -97 | -83 | -28 | -62 |
| Cx3cr1          | 97  | 95  | 98  | 51  | 96  | 98  | Cx3cr1  | 97  | 95  | 98  | 51  | 96  | 98  | Htr5a  | -34 | -60 | -87 | -34 | -2  | -39 | Gpr153  | -17 | -25 | -27 | -70 | -31 | -64 |
| Cyslr1          | 34  | 39  | 59  | 67  | 29  | 47  | Cyslr1  | 34  | 39  | 59  | 67  | 29  | 47  | Htr5b  | -73 | -56 | -50 | -62 | -43 | -77 | Gpr165  | -11 | 10  | -31 | -36 | 24  | 3   |
| Cyslr2          | -61 | -62 | -66 | -47 | -16 | -15 | Cyslr2  | -61 | -62 | -66 | -47 | -16 | -15 | Htr6   | -73 | -95 | -90 | -49 | -90 | -41 | Hsd17b1 | -37 | -71 | -66 | -98 | -57 | -36 |
| Drd2            | -73 | -67 | -55 | -80 | -21 | -57 | Drd2    | -73 | -67 | -55 | -80 | -21 | -57 | Htr7   | -53 | -81 | -42 | 92  | -9  | 5   | Oxgr1   | -79 | -47 | -84 | -93 | -97 | -89 |
| Drd3            | -84 | -89 | -89 | -79 | -30 | -78 | Drd3    | -84 | -89 | -89 | -79 | -30 | -78 | Kiss1r | -70 | -74 | -68 | -22 | 35  | -31 | Pkhd11  | -60 | -59 | -36 | -18 | -40 | -55 |
| Drd4            | -68 | -47 | -60 | -63 | -39 | -33 | Drd4    | -68 | -47 | -60 | -63 | -39 | -33 | Lgr4   | -23 | -18 | -30 | -82 | -71 | 89  | Trhr2   | -74 | -29 | -78 | -84 | -10 | -44 |
| F2r             | 82  | 81  | 88  | -13 | 78  | 37  | F2r     | 82  | 81  | 88  | -13 | 78  | 37  | Lgr5   | -43 | -68 | -40 | -69 | -40 | -63 | Gpr137  | -55 | -52 | -58 | -20 | -58 | -50 |
| F2r1            | -12 | -3  | -4  | -20 | -3  | 1   | F2r1    | -12 | -3  | -4  | -20 | -3  | 1   | Lgr6   | -5  | -5  | -5  | -15 | -33 | -43 | Gpr137b | 79  | 79  | 93  | 92  | 79  | 80  |
| F2r2            | -64 | -67 | -47 | -7  | -19 | -36 | F2r2    | -64 | -67 | -47 | -7  | -19 | -36 | Lhcr   | -89 | -84 | -77 | -90 | -74 | -73 | Pth1r   | 35  | 52  | -9  | -90 | -76 | -59 |
| F2r3            | -60 | -56 | -56 | -83 | -51 | -57 | F2r3    | -60 | -56 | -56 | -83 | -51 | -57 | Lpar1  | 46  | 49  | 8   | -27 | -42 | -60 | Pth2r   | -67 | -65 | -83 | -94 | -65 | -79 |
| Ffar2           | 66  | 59  | 59  | -1  | 52  | 15  | Ffar2   | 66  | 59  | 59  | -1  | 52  | 15  | Lpar2  | 45  | 64  | 53  | -23 | 24  | 12  | Calcrl  | 80  | 80  | 64  | -26 | 60  | 61  |
| Fpr1            | 65  | 64  | 72  | 17  | 57  | 63  | Fpr1    | 65  | 64  | 72  | 17  | 57  | 63  | Lpar3  | 25  | 29  | -9  | 100 | -5  | 7   | Cmr1    | -48 | -34 | -19 | -2  | -45 | -25 |
| Fpr3            | -78 | -75 | -12 | -74 | -7  | -17 | Fpr3    | -78 | -75 | -12 | -74 | -7  | -17 | Lpar4  | 90  | 90  | 48  | -19 | 44  | -13 | Cmr2    | -59 | -65 | -73 | -54 | -37 | -89 |
| Fshr            | -40 | 43  | -21 | -3  | -57 | -12 | Fshr    | -40 | 43  | -21 | -3  | -57 | -12 | Ltb4r1 | 61  | 60  | 72  | 59  | 82  | 86  | Celsr1  | 6   | 33  | 40  | 94  | -11 | -1  |
| Galr1           | -18 | -68 | -59 | -81 | 29  | -75 | Galr1   | -18 | -68 | -59 | -81 | 29  | -75 | Ltb4r2 | -32 | -57 | -48 | -36 | 6   | -45 | Celsr2  | -3  | -3  | -48 | -15 | -44 | -71 |
| Galr2           | -84 | -81 | -97 | -85 | -69 | -83 | Galr2   | -84 | -81 | -97 | -85 | -69 | -83 | Mas1   | -69 | -82 | -93 | -79 | -12 | -   |         |     |     |     |     |     |     |

Receptor expression in bipotent progenitors (BP) and AT2 cells relative to cells in GEXC

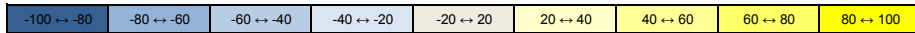

| Gene            | BP  |     |     | AT2 |     |     | Gene   | BP  |     |     | AT2 |     |     | Gene      | BP  |     |     | AT2 |     |     |      |     |     |     |     |     |     |  |  |  |  |  |  |  |  |  |  |  |  |
|-----------------|-----|-----|-----|-----|-----|-----|--------|-----|-----|-----|-----|-----|-----|-----------|-----|-----|-----|-----|-----|-----|------|-----|-----|-----|-----|-----|-----|--|--|--|--|--|--|--|--|--|--|--|--|
|                 | 1   | 2   | 3   | 1   | 2   | 3   |        | 1   | 2   | 3   | 1   | 2   | 3   |           | 1   | 2   | 3   | 1   | 2   | 3   |      |     |     |     |     |     |     |  |  |  |  |  |  |  |  |  |  |  |  |
| <b>GPCR</b>     |     |     |     |     |     |     |        |     |     |     |     |     |     |           |     |     |     |     |     |     |      |     |     |     |     |     |     |  |  |  |  |  |  |  |  |  |  |  |  |
| Gipr            | 22  | -8  | 10  | -61 | 65  | -51 | Ptprv  | -68 | -74 | -64 | -63 | -6  | -34 | Gfra3     | 16  | -19 | -39 | 21  | 6   | -34 | Fzd3 | 1   | -6  | -42 | 37  | -48 | -35 |  |  |  |  |  |  |  |  |  |  |  |  |
| Glip1r          | 6   | -33 | -26 | -36 | -24 | -79 | Ptpra  | -58 | -16 | -39 | -33 | 17  | -16 | Gfra4     | -76 | -85 | -92 | -70 | -83 | -60 | Fzd4 | 22  | 32  | -9  | -15 | -27 | -41 |  |  |  |  |  |  |  |  |  |  |  |  |
| Gpr98           | -39 | -44 | -52 | -11 | -14 | -46 | Ptprg  | 63  | 59  | 91  | 86  | 82  | 93  | Acvr1     | 66  | 65  | 67  | 83  | -14 | 22  | Fzd5 | 74  | 74  | 79  | 52  | 43  | 66  |  |  |  |  |  |  |  |  |  |  |  |  |
| Sctr            | -73 | -78 | -62 | -54 | -51 | -16 | Ptprh  | 88  | 86  | 36  | -45 | -34 | -36 | Acvr1b    | 11  | 13  | 15  | 27  | 18  | -37 | Fzd6 | 57  | 54  | 51  | 72  | -32 | -46 |  |  |  |  |  |  |  |  |  |  |  |  |
| Vipr1           | -52 | -46 | -84 | -4  | 0   | -5  | Ptprz1 | -19 | -29 | -44 | 17  | -46 | -52 | Acvr1c    | -29 | -18 | -60 | -31 | -54 | -53 | Fzd7 | 70  | 68  | 54  | 19  | -17 | 13  |  |  |  |  |  |  |  |  |  |  |  |  |
| Vipr2           | -42 | -68 | -61 | -69 | -49 | -59 | Ptprz2 | -21 | -23 | -44 | -33 | -37 | -67 | Acvr1d    | 59  | 59  | 5   | 56  | -7  | 18  | Fzd8 | 66  | 67  | 27  | 16  | -47 | -70 |  |  |  |  |  |  |  |  |  |  |  |  |
| Casr            | -51 | -14 | -63 | -1  | -21 | -26 | Ptprm  | -74 | -70 | -66 | -84 | -69 | -60 | Bmpr1a    | 31  | 33  | 49  | 17  | -34 | -40 | Fzd9 | -83 | -87 | -73 | -77 | -41 | -72 |  |  |  |  |  |  |  |  |  |  |  |  |
| Gabbr1          | -14 | -10 | -17 | -19 | -49 | -25 | Ptprm2 | -29 | -68 | -13 | -20 | 46  | -58 | Bmpr1b    | -10 | 5   | -72 | 52  | -46 | -60 | Lrp5 | -89 | -96 | -86 | -90 | -87 | -68 |  |  |  |  |  |  |  |  |  |  |  |  |
| Gpr158          | -66 | -73 | -64 | -49 | -51 | -78 | Axl    | 48  | 41  | 64  | 17  | -46 | -22 | Tgfb1     | 71  | 63  | 89  | 76  | 56  | 76  | Lrp6 | -41 | -26 | -20 | -26 | -18 | -20 |  |  |  |  |  |  |  |  |  |  |  |  |
| Gpr179          | -63 | -63 | -70 | -32 | -39 | 30  | Merlk  | 59  | 53  | 68  | 61  | -1  | 5   | Ret       | -32 | -37 | -71 | -28 | -21 | -14 |      |     |     |     |     |     |     |  |  |  |  |  |  |  |  |  |  |  |  |
| Gprc5b          | -35 | -22 | -48 | -19 | -37 | -51 | Tyro3  | -24 | 3   | -70 | 38  | -58 | -59 | Acvr2a    | -72 | -78 | -58 | -52 | -10 | -32 |      |     |     |     |     |     |     |  |  |  |  |  |  |  |  |  |  |  |  |
| Gprc5c          | -38 | -22 | -73 | 53  | -51 | -41 | Egfr   | -14 | -17 | 24  | -49 | -83 | -94 | Acvr2b    | -46 | -3  | -2  | -22 | -71 | -76 |      |     |     |     |     |     |     |  |  |  |  |  |  |  |  |  |  |  |  |
| Gprc5d          | -73 | -72 | -65 | -19 | -27 | -80 | Erb2   | -34 | -15 | -36 | -6  | -51 | -77 | Amhr2     | 0   | 11  | 31  | -54 | -9  | -37 |      |     |     |     |     |     |     |  |  |  |  |  |  |  |  |  |  |  |  |
| Gprc5a          | -5  | -24 | -45 | -63 | -77 | -66 | Erb3   | 27  | 34  | 14  | -4  | -40 | -39 | Bmpr2     | 56  | 54  | 62  | 23  | 22  | 29  |      |     |     |     |     |     |     |  |  |  |  |  |  |  |  |  |  |  |  |
| Grm1            | -57 | -67 | -78 | -66 | -52 | -51 | Erb4   | -68 | -83 | -86 | -95 | -69 | -86 | Tgfb2     | 58  | 54  | 84  | 66  | 42  | 61  |      |     |     |     |     |     |     |  |  |  |  |  |  |  |  |  |  |  |  |
| Grm2            | -38 | -38 | -70 | -83 | -57 | -66 | Epha1  | 44  | 20  | -11 | -24 | -7  | -43 | Eng       | 58  | 61  | -21 | -46 | 0   | -4  |      |     |     |     |     |     |     |  |  |  |  |  |  |  |  |  |  |  |  |
| Grm3            | -49 | -82 | -88 | -52 | -35 | -91 | Epha10 | -55 | -41 | -32 | -81 | -20 | -24 | Tgfb3     | 37  | 34  | 27  | -40 | 4   | 21  |      |     |     |     |     |     |     |  |  |  |  |  |  |  |  |  |  |  |  |
| Grm4            | -69 | -77 | -66 | -26 | -56 | -61 | Epha2  | 55  | 59  | 65  | 40  | 4   | -5  | Cd27      | -52 | -79 | -77 | -71 | -3  | -7  |      |     |     |     |     |     |     |  |  |  |  |  |  |  |  |  |  |  |  |
| Grm5            | -58 | -56 | -83 | -95 | -19 | -67 | Epha3  | 78  | 78  | 72  | -99 | -30 | -85 | Cd40      | 42  | 30  | 9   | 84  | 83  | 77  |      |     |     |     |     |     |     |  |  |  |  |  |  |  |  |  |  |  |  |
| Grm7            | -78 | -61 | -78 | -71 | -25 | -62 | Epha4  | 19  | 30  | 26  | -69 | -14 | -9  | Eda2r     | -53 | -56 | -64 | -83 | -50 | -77 |      |     |     |     |     |     |     |  |  |  |  |  |  |  |  |  |  |  |  |
| Grm8            | -77 | -73 | -90 | -78 | -31 | -45 | Epha5  | -9  | -10 | -51 | -92 | -55 | -97 | Edar      | -46 | -67 | -44 | -33 | -34 | -18 |      |     |     |     |     |     |     |  |  |  |  |  |  |  |  |  |  |  |  |
| Gprc5a          | 45  | 45  | 74  | 19  | -7  | -16 | Epha6  | -67 | -79 | -60 | -94 | -39 | -75 | Fas       | -34 | -33 | -5  | 14  | -32 | -11 |      |     |     |     |     |     |     |  |  |  |  |  |  |  |  |  |  |  |  |
| Gpr143          | -46 | -61 | -74 | -88 | -51 | -47 | Epha7  | 23  | 39  | 11  | -39 | -36 | -28 | Ltbr      | -3  | 2   | 11  | 11  | -24 | 24  |      |     |     |     |     |     |     |  |  |  |  |  |  |  |  |  |  |  |  |
| Gpr108          | -23 | -34 | -4  | 10  | -76 | -9  | Epha8  | -22 | -53 | -40 | -30 | 38  | -29 | Ngrf      | -60 | -67 | -83 | -56 | -94 | -44 |      |     |     |     |     |     |     |  |  |  |  |  |  |  |  |  |  |  |  |
| Gpr107          | 98  | 99  | 78  | 58  | 49  | 72  | Ephb1  | -16 | -10 | -33 | -81 | -32 | -71 | Ngrap1    | -18 | -19 | -22 | 4   | -41 | -42 |      |     |     |     |     |     |     |  |  |  |  |  |  |  |  |  |  |  |  |
| Tmem87a         | -25 | -35 | -22 | -9  | -47 | -35 | Ephb2  | -41 | -32 | -70 | -69 | -76 | -86 | Relt      | 91  | 91  | 69  | 53  | 75  | 80  |      |     |     |     |     |     |     |  |  |  |  |  |  |  |  |  |  |  |  |
| Tmem87b         | 67  | 71  | 77  | 15  | 13  | 37  | Ephb3  | 74  | 57  | 44  | -19 | -35 | -68 | Tnfrsf10b | -61 | -53 | -92 | -36 | -6  | -36 |      |     |     |     |     |     |     |  |  |  |  |  |  |  |  |  |  |  |  |
| Gpr155          | 11  | 9   | 11  | 97  | 46  | 21  | Ephb4  | 60  | 63  | -32 | -63 | -89 | -62 | Tnfrsf11a | -1  | -21 | -6  | -12 | -27 | -11 |      |     |     |     |     |     |     |  |  |  |  |  |  |  |  |  |  |  |  |
| Gpr89           | -78 | -77 | -95 | -75 | -84 | -82 | Eph6   | -42 | -29 | -71 | -31 | -49 | -25 | Tnfrsf11b | -6  | -1  | -49 | -38 | -51 | -82 |      |     |     |     |     |     |     |  |  |  |  |  |  |  |  |  |  |  |  |
| Tpra1           | -8  | -4  | -36 | -67 | -74 | -11 | Fgfr1  | -25 | -20 | -11 | 57  | -29 | -17 | Tnfrsf12a | 0   | 4   | 13  | -14 | -19 | 9   |      |     |     |     |     |     |     |  |  |  |  |  |  |  |  |  |  |  |  |
| <b>Hedgehog</b> |     |     |     |     |     |     |        |     |     |     |     |     |     |           |     |     |     |     |     |     |      |     |     |     |     |     |     |  |  |  |  |  |  |  |  |  |  |  |  |
| Npc1            | 58  | 62  | 65  | 71  | -29 | 71  | Fgfr2  | 73  | 79  | 28  | 28  | -17 | -14 | Tnfrsf13b | 18  | 11  | 11  | 33  | -2  | 33  |      |     |     |     |     |     |     |  |  |  |  |  |  |  |  |  |  |  |  |
| Ptch1           | 86  | 85  | 80  | 4   | 6   | -42 | Fgfr3  | 62  | 59  | 32  | 70  | -49 | -29 | Tnfrsf13c | -83 | -95 | -57 | -17 | 38  | 23  |      |     |     |     |     |     |     |  |  |  |  |  |  |  |  |  |  |  |  |
| Ptch2           | 97  | 98  | 66  | 44  | 62  | 70  | Fgfr4  | 66  | 68  | 53  | 36  | 47  | 46  | Tnfrsf14  | -53 | -70 | -26 | -73 | -16 | -13 |      |     |     |     |     |     |     |  |  |  |  |  |  |  |  |  |  |  |  |
| Smo             | 23  | 28  | -12 | -43 | -65 | -64 | Fgfr1  | 0   | 27  | 14  | -30 | 22  | -50 | Tnfrsf17  | -89 | -77 | -60 | 81  | 48  | 91  |      |     |     |     |     |     |     |  |  |  |  |  |  |  |  |  |  |  |  |
| <b>Inositol</b> |     |     |     |     |     |     |        |     |     |     |     |     |     |           |     |     |     |     |     |     |      |     |     |     |     |     |     |  |  |  |  |  |  |  |  |  |  |  |  |
| Itpr1           | -1  | -4  | -19 | 41  | -10 | -1  | Met    | 45  | 51  | 32  | 53  | 6   | 10  | Tnfrsf18  | -26 | -19 | -30 | 33  | 32  | 62  |      |     |     |     |     |     |     |  |  |  |  |  |  |  |  |  |  |  |  |
| Itpr2           | 37  | 28  | 51  | 64  | 79  | 82  | Mst1r  | -15 | -3  | -29 | -82 | -20 | -73 | Tnfrsf19  | 20  | 23  | 12  | -49 | -34 | -59 |      |     |     |     |     |     |     |  |  |  |  |  |  |  |  |  |  |  |  |
| Itpr3           | -17 | -1  | -19 | 7   | 8   | 35  | Alk    | -70 | -45 | -86 | -56 | -50 | -34 | Tnfrsf1a  | 86  | 80  | 98  | 73  | 100 | 99  |      |     |     |     |     |     |     |  |  |  |  |  |  |  |  |  |  |  |  |
| C6              | -11 | -11 | -46 | -4  | -74 | -20 | Ddr1   | 76  | 78  | 67  | 78  | 53  | 7   | Tnfrsf1b  | 87  | 84  | 93  | 89  | 93  | 97  |      |     |     |     |     |     |     |  |  |  |  |  |  |  |  |  |  |  |  |
| C8a             | -80 | -92 | -92 | -35 | -29 | 27  | Ddr2   | 2   | -2  | -8  | -67 | -51 | -42 | Tnfrsf21  | 74  | 69  | -83 | 65  | -5  | 77  |      |     |     |     |     |     |     |  |  |  |  |  |  |  |  |  |  |  |  |
| C8b             | -74 | -61 | -49 | -33 | -34 | 40  | Igf1r  | 82  | 85  | 90  | 64  | 79  | 81  | Tnfrsf22  | -24 | -51 | -29 | -37 | -47 | -11 |      |     |     |     |     |     |     |  |  |  |  |  |  |  |  |  |  |  |  |
| C8c             | -72 | -68 | -63 | -63 | -35 | -60 | Igf2r  | 79  | 74  | 69  | 84  | 45  | 39  | Tnfrsf23  | -49 | -65 | -49 | -59 | -66 | -32 |      |     |     |     |     |     |     |  |  |  |  |  |  |  |  |  |  |  |  |
| C9              | -72 | -68 | -63 | -63 | -35 | -60 | Insr   | 49  | 48  | 66  | 18  | 51  | 18  | Tnfrsf25  | -29 | -14 | -18 | -18 | 35  | 32  |      |     |     |     |     |     |     |  |  |  |  |  |  |  |  |  |  |  |  |
| Cd320           | -30 | -91 | -12 | -37 | 0   | -19 | Insr   | -58 | -19 | -77 | -87 | 40  | -9  | Tnfrsf4   | -39 | -51 | -13 | -5  | -16 | -8  |      |     |     |     |     |     |     |  |  |  |  |  |  |  |  |  |  |  |  |
| D18Erd653e      | 8   | 31  | 49  | -10 | -22 | 17  | Ltk    | -38 | -43 | -45 | 34  | 55  | -6  | Tnfrsf8   | -93 | -79 | -83 | -85 | -20 | -64 |      |     |     |     |     |     |     |  |  |  |  |  |  |  |  |  |  |  |  |
| Ldlr            | 69  | 70  | 85  | 52  | 65  | 84  | Ntrk1  | -38 | -35 | -86 | -87 | -14 | -76 | Tnfrsf9   | -70 | -61 | -23 | -4  | -15 | -7  |      |     |     |     |     |     |     |  |  |  |  |  |  |  |  |  |  |  |  |
| Ldlrad3         | 80  | 74  | 18  | -45 | 65  | 71  | Ntrk2  | -29 | -43 | -48 | -89 | -79 | -55 | Cd180     | -12 | -3  | -18 | -2  | 26  | -9  |      |     |     |     |     |     |     |  |  |  |  |  |  |  |  |  |  |  |  |
| Lrp1            | 41  | 48  | 85  | -21 | 41  | -16 | Ntrk3  | -5  | -8  | -51 | -97 | -68 | -42 | Tlr1      | -4  | -8  | -6  | -3  | 37  | 38  |      |     |     |     |     |     |     |  |  |  |  |  |  |  |  |  |  |  |  |
| Lrp10           | -2  | 0   | 46  | 52  | 48  | 47  | Ptk7   | -19 | -31 | -59 | -50 | -53 | -67 | Tlr2      | -48 | -55 | -76 | -12 | -14 | -59 |      |     |     |     |     |     |     |  |  |  |  |  |  |  |  |  |  |  |  |
| Lrp11           | -41 | -30 | -81 | -18 | -60 | -72 | Ros1   | -58 | -64 | -58 | -72 | -65 | -62 | Tlr3      | 36  | 36  | 50  | 13  | 49  | 65  |      |     |     |     |     |     |     |  |  |  |  |  |  |  |  |  |  |  |  |
| Lrp12           | 55  | 54  | 81  | 23  | -73 | 3   | Csf1r  | 82  | 80  | 90  | 76  | 88  | 90  | Tlr4      | 74  | 72  | 86  | 53  | 62  | 67  |      |     |     |     |     |     |     |  |  |  |  |  |  |  |  |  |  |  |  |
| Lrp1b           | -62 | -35 | -68 | -58 | 31  | -21 | Fit1   | 75  | 78  | 63  | 17  | 32  | 63  | Tlr5      | -11 | 0   | 36  | 83  | 14  | 34  |      |     |     |     |     |     |     |  |  |  |  |  |  |  |  |  |  |  |  |
| Lrp2            | -8  | -7  | -54 | -8  | -37 | -23 | Fit3   | -49 | -42 | -51 | 92  | 80  | 85  | Tlr6      | 33  | 30  | 36  | 1   | 99  | 98  |      |     |     |     |     |     |     |  |  |  |  |  |  |  |  |  |  |  |  |
| Lrp3            | -85 | -90 | -95 | -91 | -59 | -86 | Fit4   | 29  | 41  | -2  | -65 | -23 | -50 | Tlr7      | 0   | -4  | 15  | -5  | 30  | 31  |      |     |     |     |     |     |     |  |  |  |  |  |  |  |  |  |  |  |  |
| Lrp4            | 63  | 55  | 66  | 58  | -44 | -8  | Kdr    | 92  | 91  | 63  | 74  | -4  | 15  | Tlr8      | -43 | -59 | -19 | -69 | -41 | 18  |      |     |     |     |     |     |     |  |  |  |  |  |  |  |  |  |  |  |  |
| Lrp8            | 10  | 15  | 20  | -35 | 25  | -15 | Kit    | 53  | 58  | 61  | 71  | -19 | -10 |           |     |     |     |     |     |     |      |     |     |     |     |     |     |  |  |  |  |  |  |  |  |  |  |  |  |

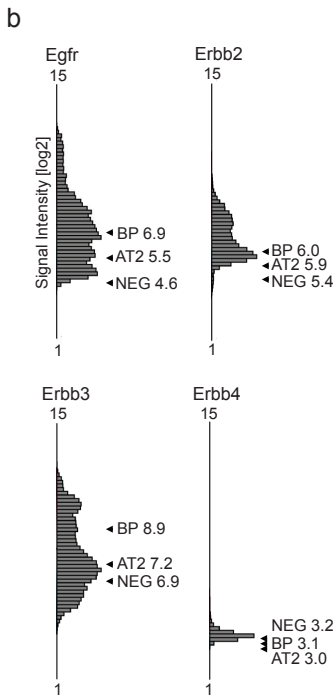

**Supplementary Table 2.** (a) Gene expression profiles of alveolar bipotent progenitors and LysM-lineage alveolar type 2 (AT2) cells. Expression levels of genes encoding receptors. Muc1+/Pdpn+ bipotent progenitor (BP) cells from E18 wild type lungs and Tomato+/EpCAM+ AT2 cells from adult LysM-Cre> tdTomato lungs were FACS purified then RNA was extracted and processed for analysis on Affymetrix DNA microarrays. Chart displays all 698 known and predicted receptor genes (H. Espinoza and M.K. unpublished) organized by receptor family in rows and biological replicates in columns. Each bin shows the percentile (-100 to +100) and heat map-coded level of expression of the corresponding gene in BP or AT2 cells relative to levels observed in >11,000 archived microarray experiments (representing hundreds or thousands of different cell and tissue types) using the identical probe, as determined from Gene Expression Commons<sup>1</sup> (GEXC). (b) Expression levels of EGF receptor family members. Representative GEXC probe set intensity histograms of expression levels for Egfr, Erbb2, Erbb3, and Erbb4, with the average intensity indicated by arrows for BP cells, AT2 cells, and for a control cell type (B cell) believed not to express any EGF receptors<sup>2,3</sup> (NEG, negative). Note that the histogram of expression levels for the Erbb4 probe is low and narrow indicating it does not provide useful Erbb4 expression information. E, embryonic day.

1 Seita, J. et al. Gene Expression Commons: an open platform for absolute gene expression profiling. PLoS One 7, e40321 (2012).

2 Yu, X. et al. Ligand-independent dimer formation of epidermal growth factor receptor (EGFR) is a step separable from ligand-induced EGFR signaling.

Mol Biol Cell 13, 2547-2557 (2002).

3 Moroni, M. et al. Epidermal growth factor receptor expression and activation in nonseminomatous germ cell tumors. Clin Cancer Res 7, 2770-2775 (2001).

a

## Selectively expressed genes

| BP       |     |            |    | AT2       |     |            |    |            |    |            |    |           |    |          |    |            |    |          |    |      |   |
|----------|-----|------------|----|-----------|-----|------------|----|------------|----|------------|----|-----------|----|----------|----|------------|----|----------|----|------|---|
| Gene     | %   | Gene       | %  | Gene      | %   | Gene       | %  | Gene       | %  | Gene       | %  | Gene      | %  | Gene     | %  | Gene       | %  | Gene     | %  | Gene | % |
| Osm      | 100 | Poldip3    | 93 | Odf3b     | 100 | Ctsb       | 98 | Clec7a     | 97 | Nbas       | 96 | Tekt2     | 94 | Sema4f   | 93 | Pcyt1a     | 92 | Pvr      | 91 |      |   |
| Pik3cd   | 99  | Ski        | 93 | Dnajb14   | 100 | Cyfp1      | 98 | Taok3      | 97 | Ezr        | 96 | Mobkl2b   | 94 | Ptpn12   | 93 | Gpr33      | 92 | Ly75     | 91 |      |   |
| Sftpc    | 99  | Jhdm1d     | 93 | Fam183b   | 100 | Chd4       | 98 | Cpeb2      | 97 | Kif13b     | 96 | Socs3     | 94 | Cmtm8    | 93 | Tppp3      | 92 | Ap3d1    | 91 |      |   |
| Abcg1    | 99  | Tgfb1      | 93 | AU021034  | 100 | Gm1574     | 98 | Sf3b2      | 97 | P14k2a     | 96 | Src3      | 94 | Cbr3     | 93 | Ccdc12     | 92 | Tnfrsf2  | 91 |      |   |
| Trpm7    | 99  | Lrrfip1    | 93 | Dnahc6    | 100 | Iqgap1     | 98 | Tmem50b    | 97 | Amac1      | 96 | Klrb1b    | 94 | Stk30    | 93 | Slc25a36   | 92 | Il1a     | 90 |      |   |
| Ets2     | 99  | Myo7a      | 93 | Trpm7     | 100 | Cotl1      | 98 | Btg2       | 97 | Bat5       | 96 | Fam167a   | 94 | Ccdc52   | 93 | Ifi77      | 92 | Ttf1     | 90 |      |   |
| Ustf2    | 98  | Kctd12b    | 93 | Ddx6      | 100 | Reep3      | 98 | Ccl22      | 97 | Dync2li1   | 96 | Usp19     | 94 | Irf8     | 93 | Hes6       | 92 | Enkur    | 90 |      |   |
| Cotl1    | 98  | Mospd2     | 93 | Dnahc9    | 100 | Fam149a    | 98 | Ing3       | 97 | Bach1      | 95 | Lrrc23    | 94 | Zze1     | 93 | Col23a1    | 92 | Nudt9    | 90 |      |   |
| Tcf7l2   | 98  | Cmtm6      | 93 | Ear3      | 100 | Ear3       | 98 | Fosb       | 97 | Ccdc108    | 95 | Scaper    | 94 | Zfp474   | 93 | Rab36      | 92 | Dnajc1   | 90 |      |   |
| Zdhc14   | 98  | Fras1      | 93 | Cd83      | 100 | Spty2d1    | 98 | Cdhr4      | 97 | Col4a3bp   | 95 | Ctsh      | 94 | Mobkl1b  | 93 | Cd80       | 92 | Cyp39a1  | 90 |      |   |
| Dag1     | 98  | Dnajb14    | 93 | Cd207     | 100 | Wdr66      | 98 | Fam164a    | 97 | Jun        | 95 | Rap2a     | 94 | Efcab1   | 93 | Ep400      | 92 | Ardc1    | 90 |      |   |
| Nlr1     | 97  | Sf3b4      | 93 | Ces1d     | 100 | Stim1      | 98 | Laptm5     | 97 | Ttc12      | 95 | Galnt11   | 94 | Uhrf1bp1 | 93 | Fam119a    | 92 | Entpd4   | 90 |      |   |
| Runx1    | 97  | Cyfp1      | 93 | Etv3      | 100 | Tctex1d4   | 98 | Tiparp     | 97 | Gm1060     | 95 | Actg1     | 94 | Atp13a3  | 93 | Tekt4      | 92 | Slc141a1 | 90 |      |   |
| Trim25   | 97  | Cd8a       | 92 | Tmem107   | 100 | Zfp800     | 98 | Hspa4l     | 97 | Cd86       | 95 | Igh-VJ558 | 94 | Il13ra1  | 93 | Armc3      | 92 | Irf5     | 90 |      |   |
| Trem1    | 97  | Cyrb1      | 92 | Lpar3     | 100 | Nav2       | 98 | Igj        | 97 | Cbfa2t3    | 95 | Ifi35     | 94 | Prkar2a  | 93 | Ptpn13     | 92 | Dnajc17  | 90 |      |   |
| C77027   | 97  | Bnip2      | 92 | Cpne3     | 100 | Parp4      | 98 | Mgl2       | 97 | Aldh1a7    | 95 | Zc3h12c   | 94 | Socs3    | 93 | Atp2b1     | 92 | Rgnf     | 90 |      |   |
| Ptnn12   | 97  | Star9      | 92 | Spag16    | 100 | Ttli3      | 98 | Unc119b    | 97 | Chchd6     | 95 | BC013712  | 94 | Caps2    | 93 | Chka       | 92 | Fam105a  | 90 |      |   |
| Ear2     | 97  | Cybas3     | 92 | Akap14    | 100 | Skil       | 98 | Rnf215     | 97 | Mycbp      | 95 | Dusp1     | 94 | Rassf7   | 93 | Atp6v0a2   | 92 | Rbpj     | 90 |      |   |
| Mapre1   | 97  | Sema3f     | 92 | Eno4      | 100 | Aldh3b1    | 98 | Tmbim1     | 97 | Ptpn11     | 95 | Far1      | 94 | Csrnp1   | 93 | Gtpbb4     | 92 | Cpd      | 90 |      |   |
| Eepd1    | 97  | Hlip       | 92 | Ftsj2     | 100 | C030046G05 | 98 | Dnaic2     | 96 | Gan        | 95 | Cd209a    | 94 | Agps     | 93 | Trpv2      | 92 | Zfp704   | 90 |      |   |
| Cx3cr1   | 97  | Fam124b    | 92 | Alcam     | 100 | Ptchd1     | 98 | H2-Ab1     | 96 | Dcxr       | 95 | Gdl2      | 94 | Mical1   | 93 | Ctcl3      | 92 | Odc1     | 90 |      |   |
| Nfkibz   | 97  | Clec4a3    | 92 | Endog     | 100 | Rsp4a      | 98 | Atf3       | 96 | Klf6       | 95 | Gna13     | 94 | Slc29a3  | 93 | Per1       | 92 | Pdlim5   | 90 |      |   |
| Gan      | 97  | Fam38a     | 92 | Ubc       | 100 | Ccr10      | 98 | Wdr19      | 96 | Ccdc153    | 95 | Tmem109   | 94 | Rc3h2    | 93 | Cyb5b1     | 92 | Tor1aip1 | 90 |      |   |
| Gpr107   | 97  | Vamp3      | 92 | Naa       | 100 | Dynlr2     | 98 | Limd1      | 96 | Cd209c     | 95 | Ucp2      | 94 | Ap1s3    | 93 | AW555355   | 92 | Yip6     | 90 |      |   |
| Irs2     | 97  | Klf6       | 92 | Nr4a2     | 99  | Pkib       | 98 | Rtrd1      | 96 | Naga       | 95 | Ifi81     | 94 | Gm5918   | 93 | Prr5l      | 92 | Dnajb2   | 90 |      |   |
| Naa      | 96  | Lem2       | 92 | Fam179a   | 99  | Ubl3       | 98 | Alas1      | 96 | Tctd18     | 95 | Cldn3     | 94 | Dab2ip   | 93 | Wdr16      | 92 | Fgl2     | 90 |      |   |
| Fosl2    | 96  | Il6ra      | 92 | Gga1      | 99  | Arh2       | 98 | Dync2h1    | 96 | Ccdc74a    | 95 | Fosl2     | 94 | Srx6     | 93 | Arf4       | 92 | Rtn4     | 90 |      |   |
| Spty2d1  | 96  | Cyp4f18    | 92 | C77027    | 99  | Arpc2      | 98 | Hectd1     | 96 | Pnrc1      | 95 | Bcl2l11   | 94 | Tbca     | 93 | Hspa2      | 92 | Ccnd1    | 90 |      |   |
| Zeb2     | 96  | Mef2a      | 92 | Irs2      | 99  | Irf5       | 98 | Nr4a3      | 96 | Atp7a      | 95 | Porcn     | 94 | Fbxw11   | 93 | Rabge1     | 91 | Trio     | 90 |      |   |
| Nr4a2    | 96  | Zkscan3    | 92 | Slc16a11  | 99  | Hspb11     | 98 | Ppp1r16a   | 96 | Il6ra      | 95 | Tnfrsf9   | 94 | Ccr2     | 93 | Rpr        | 91 | Hnmp2    | 90 |      |   |
| Plixdc2  | 96  | Cttnbp2nl  | 92 | Kif6      | 99  | Zeb2       | 98 | Sh3pxd2b   | 96 | Oscp1      | 95 | Cab39     | 94 | Xist     | 93 | Rnf166     | 91 | Orai1    | 90 |      |   |
| Sf1      | 96  | Cpeb2      | 92 | Fam47e    | 99  | Gl25d1     | 98 | Tnfrsf3    | 96 | Ndel1      | 95 | Efr3a     | 94 | Tmem176a | 93 | Mli5       | 91 | Skap2    | 90 |      |   |
| Sh3bp5   | 96  | Kank2      | 92 | Slc35a5   | 99  | Camk1d     | 98 | Tob2       | 96 | H2-Eb1     | 95 | Chuk      | 94 | Tc7      | 93 | Mvp        | 91 | Skap2    | 90 |      |   |
| Diap2    | 96  | Ptch2      | 92 | Lrk1      | 99  | Grasp      | 98 | Mga        | 96 | Cetn4      | 95 | Mycbp     | 94 | Atp7     | 93 | Pdcd6ip    | 91 | Aldh16a1 | 90 |      |   |
| Slc35a5  | 96  | Uxs1       | 92 | Wdyhv1    | 99  | Egr2       | 98 | Nab1       | 96 | Leprot     | 95 | Lztf1     | 94 | Kif21a   | 93 | Irfd1      | 91 | Dhd1     | 90 |      |   |
| Kdm6b    | 96  | Ergic3     | 92 | Abcg1     | 99  | Cd44       | 98 | Kcnmb2     | 96 | Nfe2l2     | 95 | Tctn2     | 94 | Ctnna1   | 93 | Zfp318     | 91 |          |    |      |   |
| Dusp16   | 96  | Eif2ak2    | 91 | Ppt1      | 99  | Wdfy4      | 98 | Lasp1      | 96 | Brd2       | 95 | Btdb7     | 94 | Lonf3    | 93 | Gdpd1      | 91 |          |    |      |   |
| Ctsh     | 96  | Map3k3     | 91 | Kdm6b     | 99  | H47        | 98 | Tpr        | 96 | Fam38a     | 95 | Cardk     | 94 | Trim25   | 93 | Snx6       | 91 |          |    |      |   |
| Ezfs     | 96  | Akap5      | 91 | Cyp2f2    | 99  | Zfp361     | 98 | Rsp3a/b    | 96 | Cdhr3      | 95 | Akap9     | 94 | Klf4     | 93 | Bcap31     | 91 |          |    |      |   |
| Sfxn2    | 95  | Tnfrsf1a   | 91 | Trib1     | 99  | Ttc34      | 98 | D19Erd744e | 96 | D15Wsu126e | 95 | Nhp1      | 94 | Rsf1     | 93 | Gm5480     | 91 |          |    |      |   |
| Clec7a   | 95  | Adora2b    | 91 | Cmtm6     | 99  | Ubcx4      | 98 | Crebpp     | 96 | Tcc1d22a   | 95 | Arl13b    | 94 | Rsp10b2  | 93 | Mapk14     | 91 |          |    |      |   |
| Edn3     | 95  | Gl25d1     | 91 | Cdcl14a   | 99  | Btg1       | 98 | Maff       | 96 | Rp2h       | 95 | Ski       | 94 | Foxa2    | 93 | Dusp16     | 91 |          |    |      |   |
| Per1     | 95  | Gadd45gip1 | 91 | Mom1      | 99  | Fbrs1      | 98 | Hfe        | 96 | Rrc51      | 95 | Fign      | 94 | Jdp2     | 93 | Crif2      | 91 |          |    |      |   |
| Maff     | 95  | Dnajb9     | 91 | Fam20b    | 99  | Myo1g      | 98 | Dnahc7a    | 96 | Mbp        | 95 | Gm2a      | 94 | Pgap2    | 93 | D19Erd652e | 91 |          |    |      |   |
| Rabge1   | 95  | Shh        | 91 | Cetn2     | 99  | Nek5       | 98 | Eif2c3     | 96 | Mospd2     | 95 | Atp7b     | 94 | Bnip2    | 93 | Gpr137b-ps | 91 |          |    |      |   |
| Usp25    | 95  | Pxdn       | 91 | Ppil6     | 99  | Mthfs      | 98 | Fam154b    | 96 | Twf2       | 95 | Ctss      | 94 | Arl3     | 93 | Irga4      | 91 |          |    |      |   |
| Kif13a   | 95  | Cd44       | 91 | Runx1     | 99  | Igae       | 98 | Picalm     | 96 | Tgfb1      | 95 | Arhgdig   | 94 | Dusp5    | 93 | Rsp11      | 91 |          |    |      |   |
| Cpne3    | 95  | Pqlc1      | 91 | Nfkbia    | 99  | Cib4       | 97 | Elof1      | 96 | Eif1       | 95 | Igh-6     | 94 | Senn1b   | 93 | Erlin1     | 91 |          |    |      |   |
| Gatad2a  | 95  | Rgs2       | 91 | H2-DMA    | 99  | Cyp2s1     | 97 | Hydin      | 96 | Wnk1       | 95 | Apoa1bp   | 94 | Traf3ip1 | 93 | Cxcl2      | 91 |          |    |      |   |
| Arndc1   | 95  | Alcam      | 91 | Spp2      | 99  | Gns        | 97 | AU017263   | 96 | Mapre1     | 95 | Tie1      | 94 | Actb     | 93 | Creb5      | 91 |          |    |      |   |
| Bcl2l11  | 95  | Hif1an     | 91 | Irx5      | 99  | Sfxn2      | 97 | Sh3brg1    | 96 | Trp73      | 95 | Pbrm1     | 94 | Hsp90b1  | 93 | Foxa1      | 91 |          |    |      |   |
| Pde7a    | 95  | Spef1      | 91 | Ttc21a    | 99  | Mapk15     | 97 | Arl6ip1    | 96 | Rela       | 95 | Sl3gal1   | 94 | Pvr      | 93 | Ttc25      | 91 |          |    |      |   |
| Trib1    | 95  | Cytl1      | 91 | Ttc30b    | 99  | Amz1       | 97 | Osgin2     | 96 | Tcf7l2     | 95 | Nfkbid    | 94 | Plek     | 93 | Abca7      | 91 |          |    |      |   |
| Crybb1   | 95  | Fosb       | 91 | H2-Aa     | 99  | Ppm1m      | 97 | Gadd45b    | 96 | Rps28      | 95 | Batf3     | 94 | Gnal2    | 93 | Jak2       | 91 |          |    |      |   |
| Hif3a    | 95  | Lyst       | 91 | Hes1      | 99  | Ifi30      | 97 | Crem       | 96 | Iffo2      | 95 | Ubn1      | 94 | Mfsd6    | 93 | AA408251   | 91 |          |    |      |   |
| Mapkap3  | 95  | Myo1c      | 91 | Ospl6     | 99  | Nfkibz     | 97 | Lca5       | 96 | Zfp445     | 95 | Fam69a    | 94 | Csde1    | 93 | Ubxn11     | 91 |          |    |      |   |
| Slc25a29 | 95  | Ndel1      | 91 | Ak7       | 99  | Map3k5     | 97 | Mfsd6l     | 96 | Ighg       | 95 | Gng10     | 94 | Rab11b   | 93 | Slc23a2    | 91 |          |    |      |   |
| Tiparp   | 95  | Lipo1      | 91 | AB041803  | 99  | Sec24b     | 97 | Pde4b      | 96 | Lrrfip1    | 95 | Egr3      | 94 | Rock1    | 93 | Pip4k2a    | 91 |          |    |      |   |
| Pcsk5    | 94  | Fam129a    | 91 | Dock10    | 99  | Irak1      | 97 | Cdc151     | 96 | Gapvd1     | 95 | Srrm2     | 94 | Cnd2     | 92 | Ammek11    | 91 |          |    |      |   |
| Hexim1   | 94  | Junb       | 91 | Ear2      | 99  | Aftph      | 97 | Foxj1      | 96 | T2         | 95 | Hepacam2  | 94 | Ccdc114  | 92 | Hdc        | 91 |          |    |      |   |
| Frat2    | 94  | Acbd3      | 91 | Gas2l2    | 99  | Lrrc45     | 97 | Fos        | 96 | Ccdc40     | 95 | Akap13    | 94 | Htr7     | 92 | Ifi88      | 91 |          |    |      |   |
| Bach1    | 94  | Hgsnat     | 91 | H2-DMb1/2 | 99  | Lem2       | 97 | Mapkap3    | 96 | Tagln2     | 95 | Rbm39     | 94 | Ang3     | 92 | Smarca2    | 91 |          |    |      |   |
| Egr1     | 94  | Ap3b1      | 91 | Egr1      | 99  | Ddx5       | 97 | Junb       | 96 | Diap2      | 95 | Hspa1b    | 94 | Wdsu1    | 92 | Muc20      | 91 |          |    |      |   |
| Crem     | 94  | P2ry13     | 91 | Ccl17     | 99  | Pcbd2      | 97 | Cldnd1     | 96 | Gt13       | 95 | Kctd12    | 94 | Mak      | 92 | Rassf9     | 91 |          |    |      |   |
| Sertad1  | 94  | Diap1      | 91 | Osm       | 99  | Ifi172     | 97 | Ap3b1      | 96 | Map2k3     | 95 | Ccdc146   | 94 | Uggt1    | 92 | Sfhn1      | 91 |          |    |      |   |
| Atp7a    | 94  | Pum1       | 91 | Syng2     | 99  | Rnaset2a/b | 97 | Fam129a    | 96 | Sdc1       | 95 | Id2       | 94 | Stc26a2  | 92 | P2rx4      | 91 |          |    |      |   |
| Frm44a   | 94  | Egr2       | 91 | Acbd3     | 98  | Gm101      | 97 | Arl6ip1    | 96 | Wdr78      | 95 | Celsr1    | 94 | Sypl     | 92 | Paq7       | 91 |          |    |      |   |
| Klhdc4   | 94  | Pde4b      | 91 | Capsl     | 98  | Scgb1a1    | 97 | Endod1     | 96 | Dnajb1     | 95 | Dpdc      | 94 | Rnf6     | 92 | Vps52      | 91 |          |    |      |   |
| Amz1     | 94  | Pde4b      | 91 | Ier2      | 98  | Pole3      | 97 | Uvrag      | 96 | Kcnj13     | 95 | Prkx      | 94 | Lsp1     | 92 | Slc12a2    | 91 |          |    |      |   |
| Rbm3s    | 94  | Chst5      | 90 | Tmem123   | 98  | Mef2a      | 97 | Rsp9r      | 96 | Cc2d2a     | 95 | Rgs2      | 94 | Tmed10   | 92 | Tssc4      | 91 |          |    |      |   |
| Zswim6   | 94  | Dgat1      | 90 | Ccdc30    | 98  | Tbc1d4     | 97 | Gm6377     | 96 | Dnahc7b    | 95 | Diap1     | 94 | Zbtb46   | 92 | Nsmf       | 91 |          |    |      |   |
| Socs3    | 94  | Mthfs      | 90 | Zfp36     | 98  | Spag9      | 97 | Tyk2       | 96 | Cytl1      | 95 | Csf2rb    | 94 | Srp14    | 92 | Mf1        | 91 |          |    |      |   |
| Myh9     | 94  | Senp7      | 90 | Tm7sf4    | 98  | Tlr3       | 97 | Antxr2     | 96 | Kif13a     | 95 | Nudt14    | 94 | Il18     | 92 | Plixnc1    | 91 |          |    |      |   |
| Ptprf    | 94  | Picalm     | 90 | Igb1      | 98  | Iqce       | 97 | Cybas3     | 96 | Gm4368     | 95 | Arc       | 94 | Fit3     | 92 | Usp6nl     | 91 |          |    |      |   |
| Mcl1     | 94  | Ccr1       | 90 | Fili      | 98  | Hps1       | 97 | Bhlhe40    | 96 | Ik         | 95 | Ehfc1     | 94 | Dusp18   | 92 | Fhdc1      | 91 |          |    |      |   |
| Ier2     | 94  | Irak4      | 90 | Spef1     | 98  | Mcl1       | 97 | Cytlp      | 96 | Nr4a1      | 95 | Arsb      | 93 | Gpr137b  | 92 | Slc22a15   | 91 |          |    |      |   |
| Nab1     | 94  | Ap1s2      | 90 | Gas8      | 98  | Emp1       | 97 | Gsto1      | 96 | Cep164     | 95 | Usp7      | 93 | Cdh1     | 92 | Fars2      | 91 |          |    |      |   |
| Zfp36    | 94  | Cd33       | 90 | Xcr1      | 98  | Tmem212    | 97 | Arhgap5    | 96 | Mettl7a1   | 95 | Pum1      | 93 | AU040972 | 92 | Nlrct1     | 91 |          |    |      |   |
| Adamtsl2 | 94  | Nai2       | 90 | Ccdc162   | 98  | Nme5       | 97 | Hspa1a     | 96 | Spag6      | 95 | Gpr120    | 93 | Irga4    | 92 | Fncd7      | 91 |          |    |      |   |
|          |     |            |    |           |     |            |    |            |    |            |    |           |    |          |    |            |    |          |    |      |   |

b

## Classes of genes most selectively expressed

| BP                                                         |                 |         | AT2                                                        |                 |         |
|------------------------------------------------------------|-----------------|---------|------------------------------------------------------------|-----------------|---------|
| Gene annotation                                            | Fold enrichment | p-value | Gene annotation                                            | Fold enrichment | p-value |
| IPR011616:bZIP transcription factor, bZIP-1                | 25              | 1.1E-04 | IPR000837:Fos transforming protein                         | 24              | 1.4E-03 |
| IPR004827:Basic-leucine zipper (bZIP) transcription factor | 16              | 2.5E-04 | cilium biogenesis/degradation                              | 16              | 9.2E-07 |
| SM00338:BRLZ                                               | 12              | 5.0E-04 | GO:0035085-cilium axoneme                                  | 11              | 1.2E-03 |
| domain:Leucine-zipper                                      | 9.2             | 8.3E-04 | IPR011616:bZIP transcription factor, bZIP-1                | 11              | 2.0E-04 |
| DNA-binding region:Basic motif                             | 6.4             | 1.6E-02 | GO:0005930-axoneme                                         | 11              | 2.6E-06 |
| GO:0003700-transcription factor activity                   | 2.7             | 1.7E-02 | IPR004827:Basic-leucine zipper (bZIP) transcription factor | 7.7             | 7.5E-05 |
| phosphoprotein                                             | 1.4             | 1.3E-02 | cilium                                                     | 7.2             | 1.3E-06 |
|                                                            |                 |         | mmu04672:Intestinal immune network for IgA production      | 6.9             | 1.1E-04 |
|                                                            |                 |         | SM00338:BRLZ                                               | 6.3             | 1.2E-04 |
|                                                            |                 |         | GO:0005929-cilium                                          | 5.6             | 3.8E-08 |

**Supplementary Table 3.** (a) Genes highly selectively expressed by bipotent progenitor (BP) and AT2 cells. Genes expressed in BP cells (average of three replicates) and AT2 cells (replicate 1) at the 90th percentile or higher (calculated by GEXC), totaling 174 genes for BP and 644 genes for AT2, 93 of which (bold type) are shared by these cell types. Genes that encode transcription factors (yellow), receptors (blue), and nuclear receptors (green) are highlighted. (b) DAVID<sup>1</sup> gene annotation enrichment analysis (<http://david.abcc.ncifcrf.gov/>) of the genes, identifying classes that are significantly overrepresented ( $p < 0.015$  with Bonferroni correction) among genes selectively expressed by BP cells and AT2 cells. The BP selective genes are enriched for bZIP transcription factors and phosphoproteins, whereas the AT2 selective genes are enriched for Fos and other bZIP genes, and cilium biogenesis genes.

1 Huang, D.W. et al. Systematic and integrative analysis of large gene lists using DAVID Bioinformatics Resources. Nat Protoc 4(1), 44 -57 (2009).
