# Supplementary material
Source: PubMed Central journal article supplement (PMC4013278)
Supplement: NIHMS570673-supplement-03.pdf [file NIHMS570673-supplement-03.pdf]

**Extended Data Table 1. Developmental expression patterns of alveolar epithelial cell markers.**

\*First position of marker class name denotes whether alveolar lineage marker is first expressed by the bipotent progenitor (P) or a mature alveolar (A) cell type, second position denotes the mature cell type labeled by the marker (AT1 (1) or AT2 (2) cell), and

third position denotes whether specificity is achieved early (E) or late (L) in the differentiation program.

†bm, basal membrane; m, membrane; am, apical membrane; c, cytoplasmic; n, nuclear

‡A pair of bipotent progenitors (squares) at a fixed representative airway position at embryonic day (E) 17.5 is shown developing into an AT1 cell (thin rectangle) and an AT2 cell (square with oval lamellar body) at E18.5. Green, cell expressing AT1 marker; red, cell expressing AT2 marker; \*, cell in which marker subsequently turns off; dashed line, cell in which marker expression has recently ceased or reduced.

§Changes localization from apical in progenitor to apical and cytoplasmic in AT2 cell

||Expression is reduced but persists in AT1 cells.

LEL, *lycopersicon esculentum* lectin; RCA I, *Ricinis communis* agglutinin I lectin
